# Supplementary material
Source: Springer Nature journal article supplement (https://www.springermedizin.de/resource/supplementary/12963_2009_75_MOESM2_ESM.pdf/9572636)
Supplement: MOESM2 [file 9572636]

| category                        | indicator               | % positive responses | % observed agreement | % expected agreement | $\kappa$ | p for observed > expected |
|---------------------------------|-------------------------|----------------------|----------------------|----------------------|----------|---------------------------|
| background                      | died in wet season      | 34.1                 | 73.3                 | 54.8                 | 0.409    | 0.000                     |
|                                 | under 20 yrs at death   | 7.3                  | 94.0                 | 86.4                 | 0.556    | 0.000                     |
|                                 | married                 | 95.7                 | 96.6                 | 91.8                 | 0.582    | 0.000                     |
|                                 | 20-34 yrs at death      | 59.9                 | 80.2                 | 52.0                 | 0.587    | 0.000                     |
|                                 | 35+ years at death      | 32.3                 | 85.3                 | 56.2                 | 0.665    | 0.000                     |
| pregnancy status                | had ever been pregnant  | 92.2                 | 86.2                 | 85.0                 | 0.055    | 0.067                     |
|                                 | early pregnancy ended   | 3.9                  | 95.7                 | 92.5                 | 0.422    | 0.000                     |
|                                 | had a previous C-sect   | 5.2                  | 96.6                 | 90.1                 | 0.651    | 0.000                     |
|                                 | pregnant at death       | 39.2                 | 85.3                 | 52.2                 | 0.693    | 0.000                     |
|                                 | > 4 pregnancies         | 27.2                 | 88.8                 | 60.1                 | 0.719    | 0.000                     |
|                                 | first pregnancy         | 24.6                 | 92.2                 | 62.9                 | 0.791    | 0.000                     |
|                                 | delivered within 6 wks  | 46.6                 | 89.7                 | 50.1                 | 0.793    | 0.000                     |
|                                 | not pregnant at death   | 10.3                 | 96.6                 | 81.5                 | 0.814    | 0.000                     |
| clinical history                | recent injury           | 6.5                  | 88.8                 | 87.8                 | 0.081    | 0.177                     |
|                                 | recent surgery          | 2.6                  | 96.6                 | 95.0                 | 0.316    | 0.000                     |
|                                 | CVD diagnosis           | 4.7                  | 94.0                 | 90.9                 | 0.339    | 0.000                     |
|                                 | TB diagnosis            | 8.6                  | 91.4                 | 84.1                 | 0.457    | 0.000                     |
|                                 | liver disease diagnosis | 6.0                  | 94.8                 | 88.6                 | 0.545    | 0.000                     |
| signs and symptoms before death | stiff neck              | 6.0                  | 87.9                 | 88.3                 | -0.031   | 0.686                     |
|                                 | foul-smelling discharge | 8.2                  | 85.3                 | 84.9                 | 0.031    | 0.362                     |
|                                 | antibiotics needed      | 25.9                 | 63.8                 | 60.2                 | 0.091    | 0.138                     |
|                                 | collapse                | 18.5                 | 73.3                 | 69.8                 | 0.116    | 0.105                     |
|                                 | blurred vision          | 13.8                 | 79.3                 | 76.2                 | 0.132    | 0.075                     |
|                                 | pallor or anaemia       | 50.4                 | 56.0                 | 49.2                 | 0.135    | 0.066                     |
|                                 | persistent fever        | 7.3                  | 88.8                 | 86.2                 | 0.186    | 0.013                     |
|                                 | night sweats            | 36.6                 | 64.7                 | 53.5                 | 0.239    | 0.005                     |
|                                 | in bed during day       | 37.9                 | 67.2                 | 51.1                 | 0.330    | 0.000                     |
|                                 | abdominal pain          | 24.1                 | 75.9                 | 63.2                 | 0.343    | 0.000                     |
|                                 | coma >24h               | 12.1                 | 86.2                 | 78.5                 | 0.357    | 0.000                     |
|                                 | jaundice                | 16.8                 | 81.9                 | 71.7                 | 0.360    | 0.000                     |
|                                 | acute fever             | 33.2                 | 73.3                 | 55.7                 | 0.398    | 0.000                     |
|                                 | swollen body            | 7.8                  | 91.4                 | 85.7                 | 0.398    | 0.000                     |
|                                 | fever with shivering    | 21.1                 | 80.2                 | 66.7                 | 0.405    | 0.000                     |
|                                 | recurrent fever         | 22.4                 | 79.3                 | 65.2                 | 0.405    | 0.000                     |
|                                 | weight loss             | 37.1                 | 72.4                 | 53.0                 | 0.413    | 0.000                     |
|                                 | persistent cough        | 16.8                 | 83.6                 | 72.0                 | 0.415    | 0.000                     |
|                                 | swollen glands          | 5.6                  | 94.0                 | 89.4                 | 0.430    | 0.000                     |
|                                 | breathless              | 24.1                 | 79.3                 | 63.4                 | 0.435    | 0.000                     |
|                                 | swollen feet            | 25.0                 | 79.3                 | 62.5                 | 0.449    | 0.000                     |
|                                 | transfusion needed      | 19.0                 | 84.5                 | 69.3                 | 0.495    | 0.000                     |
|                                 | ever had fits           | 13.4                 | 88.8                 | 76.8                 | 0.516    | 0.000                     |
| coughing blood                  | 7.8                     | 93.1                 | 85.7                 | 0.519                | 0.000    |                           |
| swollen face                    | 7.8                     | 94.8                 | 85.7                 | 0.639                | 0.000    |                           |

|                     |                                       |      |      |      |        |       |
|---------------------|---------------------------------------|------|------|------|--------|-------|
| obstetric<br>record | unwanted pregnancy                    | 28.0 | 59.5 | 59.6 | -0.004 | 0.516 |
|                     | bleeding in 1 <sup>st</sup> trimester | 6.0  | 89.7 | 88.6 | 0.089  | 0.166 |
|                     | labour >24h                           | 6.0  | 91.4 | 88.6 | 0.244  | 0.003 |
|                     | died in labour                        | 4.3  | 94.8 | 91.7 | 0.374  | 0.000 |
|                     | big baby                              | 7.8  | 91.4 | 85.7 | 0.398  | 0.000 |
|                     | death within 24h of del               | 14.2 | 85.3 | 75.5 | 0.402  | 0.000 |
|                     | bleeding at delivery                  | 23.7 | 78.5 | 63.8 | 0.404  | 0.000 |
|                     | fits during pregnancy                 | 7.3  | 92.2 | 86.4 | 0.429  | 0.000 |
|                     | placenta retained                     | 8.6  | 91.4 | 84.2 | 0.455  | 0.000 |
|                     | baby part prolapsed                   | 3.0  | 97.4 | 94.1 | 0.558  | 0.000 |
|                     | first trimester death                 | 8.6  | 93.1 | 84.2 | 0.564  | 0.000 |
|                     | abnormal baby position                | 4.3  | 96.6 | 91.7 | 0.585  | 0.000 |
|                     | BP raised in pregnancy                | 19.4 | 90.5 | 68.7 | 0.697  | 0.000 |
|                     | baby delivered alive                  | 44.4 | 87.1 | 50.6 | 0.738  | 0.000 |
|                     | professional care at del              | 26.3 | 90.5 | 61.2 | 0.756  | 0.000 |
|                     | multiple pregnancy                    | 5.6  | 97.4 | 89.4 | 0.756  | 0.000 |
|                     | delivered in a facility               | 19.0 | 93.1 | 69.3 | 0.776  | 0.000 |
|                     | delivered at home                     | 39.7 | 91.4 | 52.1 | 0.820  | 0.000 |
|                     | assisted delivery                     | 6.0  | 98.3 | 88.7 | 0.848  | 0.000 |
|                     | delivered by C-section                | 5.6  | 99.1 | 89.4 | 0.919  | 0.000 |
